# Supplementary material for: Orientation in the European common frogRana temporariaduring the first wintering migration
Source: Oxford University Press journal article supplement (doi:10.1242/jeb.243761), 2022-08-19
Supplement: jeb243761supp.pdf [file jeb243761supp.pdf]

**Table S1. Results of all experiments conducted with froglets**

| Year                                                                                                   | Date of capture | Date of release | Location of capture | Location of arena, side of the river | N of released | Number of check | Total N of recaptured* | N of Y-O-T-Y froglets** | Exact N*** | Rayleigh Z;P               | r (CSD)         | $\mu$ (°) | N in first check | Rayleigh Z;P               | r (CSD)         | $\mu$ (°) | Wind direction |
|--------------------------------------------------------------------------------------------------------|-----------------|-----------------|---------------------|--------------------------------------|---------------|-----------------|------------------------|-------------------------|------------|----------------------------|-----------------|-----------|------------------|----------------------------|-----------------|-----------|----------------|
| <i>Froglets from right side population, captured and released 14-17 days before start of migration</i> |                 |                 |                     |                                      |               |                 |                        |                         |            |                            |                 |           |                  |                            |                 |           |                |
| 2017                                                                                                   | September 21    | September 21    | F1                  | left                                 | 45            | 4               | 48 <sup>a</sup>        | 45                      | 45         | 3.07;<br><b>0.045</b>      | 0.26<br>(93.9)  | 182       | 30               | 3.09;<br><b>0.044</b>      | 0.32<br>(86.4)  | 202       | N              |
| 2017                                                                                                   | September 20    | September 20    | F1                  | right                                | 39            | 4               | 39                     | 39                      | 39         | 24.08;<br><b>&lt;0.001</b> | 0.79<br>(39.8)  | 140       | 30               | 22.93;<br><b>&lt;0.001</b> | 0.87<br>(29.7)  | 137       | Calm           |
| 2017                                                                                                   | September 23    | September 23    | F1                  | right                                | 45            | 4               | 33                     | 33                      | 33         | 24.47;<br><b>&lt;0.001</b> | 0.86<br>(31.3)  | 140       | 28               | 19.84<br><b>&lt;0.001</b>  | 0.84<br>(33.6)  | 143       | Calm           |
| 2017 pooled sample                                                                                     |                 |                 | F1                  | right                                | 84            | 4               | 72                     | 72                      | 72         | 48.45;<br><b>&lt;0.001</b> | 0.82<br>(36.1)  | 140       | 58               | 42.66<br><b>&lt;0.001</b>  | 0.86<br>(31.8)  | 140       | ---            |
| <i>Froglets from right side population, captured and released 1-3 days before start of migration</i>   |                 |                 |                     |                                      |               |                 |                        |                         |            |                            |                 |           |                  |                            |                 |           |                |
| 2016                                                                                                   | September 18    | September 18    | F1                  | left                                 | 64            | 5               | 57                     | 57                      | 57         | 2.15;<br>0.12              | 0.19<br>(103.7) | ---       | 28               | 0.23;<br>0.8               | 0.09<br>(125.9) | ---       | N              |
| 2016                                                                                                   | September 19    | September 19    | F1                  | right                                | 54            | 3               | 49 <sup>b</sup>        | 48                      | 39         | 2.46;<br>0.085             | 0.25<br>(95.3)  | ---       | 16               | 2.06;<br>0.13              | 0.36<br>(82)    | ---       | N              |
| 2017                                                                                                   | October 5       | October 5       | F1                  | right                                | 44            | 2               | 44                     | 44                      | 44         | 0.49;<br>0.62              | 0.11<br>(121.6) | ---       | 27               | 0.99;<br>0.37              | 0.19<br>(104)   | ---       | S              |
| 2018                                                                                                   | September 20    | September 20    | F1                  | right                                | 32            | 2               | 34                     | 33                      | 33         | 1.15;<br>0.32              | 0.19<br>(104.9) | ---       | 28               | 0.68;<br>0.51              | 0.16<br>(110.6) |           | SW             |
| 2016+2017+2018, 1-3 days before migration, pooled sample                                               |                 |                 | F1                  | right                                | 130           | 2-3             | 127                    | 125                     | 116        | 2.55;<br><b>0.029</b>      | 0.18<br>(107)   | 124       | 71               | 2.92<br>0.054              | 0.2<br>(102.3)  | ---       | ---            |
| <i>Froglets from right side population, captured and released after start of migration</i>             |                 |                 |                     |                                      |               |                 |                        |                         |            |                            |                 |           |                  |                            |                 |           |                |

|                               |                      |              |           |                             |     |         |     |     |                 |                                  |                |           |     |                              |                 |               |      |
|-------------------------------|----------------------|--------------|-----------|-----------------------------|-----|---------|-----|-----|-----------------|----------------------------------|----------------|-----------|-----|------------------------------|-----------------|---------------|------|
| 2016                          | September 21         | September 21 | F1        | left                        | 84  | 4       | 77  | 77  | 76              | 4.5;<br><b>0.01</b>              | 0.24<br>(96.3) | 197       | 48  | 4.31;<br>0.01                | 0.3<br>(88.96)  | 194           | Calm |
| 2018                          | September 23         | September 23 | F1        | right                       | 64  | 3       | 59  | 57  | 56              | 2.29;<br>0.1                     | 0.2<br>(102.4) | ---       | 53  | 1.8;<br>0.17                 | 0.18<br>(105.4) | ---           | WNW  |
| 2018                          | September 25         | September 25 | F1        | right                       | 36  | 2       | 29  | 29  | 29              | 1.46;<br>0.23                    | 0.23<br>(99)   | ---       | 25  | 2.35;<br>0.095               | 0.31<br>(88.1)  | ---           | W    |
| 2018, pooled sample           |                      |              | F1        | right                       | 100 | 2-<br>3 | 88  | 86  | 85              | 8.5;<br><b>&lt;0.001</b><br>**** | 0.2<br>(102)   | NW,<br>SE | 78  | 5.99<br><b>0.002</b><br>**** | 0.22<br>(100.2) | N<br>W,<br>SE |      |
| 2018                          | September 20, 23, 25 | September 28 | F1        | right<br>(repeated release) | 118 | 1       | 117 | 117 | 117             | 17.62;<br><b>&lt;0.001</b>       | 0.39<br>(78.8) | 298       | -/- | -/-                          | -/-             | -/-           | WNW  |
| 2018                          | September 23         | September 23 | M         | left                        | 119 | 2       | 107 | 104 | 104             | 40.36;<br><b>&lt;0.001</b>       | 0,62<br>(55,7) | 13        | 101 | 42.84;<br><b>&lt;0.001</b>   | 0,65<br>(53)    | 13            | WNW  |
| 2018                          | September 26         | September 26 | M         | right                       | 101 | 3       | 98  | 89  | 89 <sup>c</sup> | 25.01;<br><b>&lt;0.001</b>       | 0,53<br>(64,6) | 320       | 73  | 21.21;<br><b>&lt;0.001</b>   | 0,54<br>(63,7)  | 328           | NW   |
| 2015                          | October 1            | October 1    | R2        | left                        | 54  | 4       | 60  | 60  | 60              | 10,47;<br><b>&lt;0.001</b>       | 0.42<br>(75.7) | 354       | 37  | 11.1<br><b>&lt;0.001</b>     | 0.55<br>(62.9)  | 354           | W    |
| 2016                          | September 20         | September 20 | R1        | right                       | 70  | 3       | 69  | 69  | 69              | 29.82;<br><b>&lt;0.001</b>       | 0.66<br>(52.5) | 337       | 36  | 17.85;<br><b>&lt;0.001</b>   | 0.7<br>(47.9)   | 332           | Calm |
| 2016                          | September 20         | September 20 | R1        | left                        | 65  | 3       | 69  | 69  | 67              | 14.89;<br><b>&lt;0.001</b>       | 0.47<br>(70.3) | 319       | 47  | 16.1;<br><b>&lt;0.001</b>    | 0.59<br>(59.3)  | 312           | NW   |
| 2018                          | September 24         | September 24 | R1        | right                       | 70  | 2       | 70  | 70  | 68              | 22.56;<br><b>&lt;0.001</b>       | 0.58<br>(60.2) | 331       | 58  | 24.58<br><b>&lt;0.001</b>    | 0.65<br>(53.1)  | 329           | WNW  |
| 2018                          | September 28         | September 28 | R1        | left                        | 69  | 3       | 66  | 64  | 63              | 16.73;<br><b>&lt;0.001</b>       | 0.52<br>(65.9) | 356       | 45  | 12.46;<br><b>&lt;0.001</b>   | 0.53<br>(64.9)  | 358           | NW   |
| 2015+2016+2018, pooled sample |                      |              | R2<br>+R1 | left                        | 188 | 3       | 194 | 193 | 190             | 38;<br><b>&lt;0.001</b>          | 0.45<br>(72.7) | 343       | 137 | 32.66;<br><b>&lt;0.001</b>   | 0.49<br>(68.6)  | 341           |      |
| 2016+2018, pooled sample      |                      |              | R1        | right                       | 140 | 2-<br>3 | 139 | 139 | 137             | 52.01;<br><b>&lt;0.001</b>       | 0.62<br>(56.4) | 334       | 94  | 42.33;<br><b>&lt;0.001</b>   | 0.67<br>(51.2)  | 330           |      |

| <i>Froglets from right side population, captured and released at night after start of migration</i>                   |                 |                       |         |       |     |     |                 |     |                 |                  |                 |     |                |                  |                |     |      |
|-----------------------------------------------------------------------------------------------------------------------|-----------------|-----------------------|---------|-------|-----|-----|-----------------|-----|-----------------|------------------|-----------------|-----|----------------|------------------|----------------|-----|------|
| 2016                                                                                                                  | September 22    | September 22          | R1      | left  | 48  | 2   | 48              | 47  | 29 <sup>d</sup> | 7;<br><0.001     | 0.49<br>(68)    | 284 | 26             | 6.57;<br>0.001   | 0,5<br>(67.2)  | 286 | Calm |
| 2017                                                                                                                  | October 13      | October 13            | R1      | left  | 45  | 2   | 44              | 39  | 36              | 10.86;<br><0.001 | 0.55<br>(62.7)  | 63  | 27             | 7.43;<br><0.001  | 0.53<br>(65)   | 65  | W    |
| 2018                                                                                                                  | September 26    | September 26          | R1      | left  | 65  | 2   | 62              | 57  | 54              | 14.21;<br><0.001 | 0.51<br>(66.2)  | 23  | 47             | 13.77;<br><0.001 | 0.54<br>(63.5) | 27  | W    |
| 2016                                                                                                                  | September 21    | September 21          | R1      | right | 51  | 3   | 53              | 53  | 53              | 6.5;<br>0.002    | 0.35<br>(82.9)  | 336 | 43             | 3.52;<br>0.029   | 0.29<br>(89.5) | 341 | Calm |
| 2018                                                                                                                  | September 27    | September 27          | R1      | right | 70  | 2   | 69              | 60  | 57              | 25.9;<br><0.001  | 0.67<br>(50.9)  | 317 | 55             | 25.79;<br><0.001 | 0.69<br>(49.9) | 317 | Calm |
| 2016+2017+2018, pooled sample                                                                                         |                 |                       | R1      | left  | 158 | 2   | 154             | 143 | 119             | 13.84;<br><0.001 | 0.34<br>(84)    | 21  | 100            | 11.86;<br><0.001 | 0,34<br>(83.6) | 20  |      |
| 2016+2018, pooled sample                                                                                              |                 |                       | R1      | right | 121 | 2-3 | 122             | 113 | 110             | 28.82;<br><0.001 | 0.51<br>(66.3)  | 324 | 98             | 24.72;<br><0.001 | 0.5<br>(67.2)  | 323 | Calm |
| <i>Froglets from left side population, captured and released after start of migration</i>                             |                 |                       |         |       |     |     |                 |     |                 |                  |                 |     |                |                  |                |     |      |
| 2017                                                                                                                  | October 7       | found in arena A***** |         | left  |     | 1   | 46              | 42  | 42              | 8.79;<br><0.001  | 0.46<br>(71.7)  | 194 | Only one check |                  |                | --- |      |
| 2017                                                                                                                  | October 7       | October 8             | arena A | right | 42  | 2   | 44              | 42  | 42              | 10.71;<br><0.001 | 0.51<br>(66.9)  | 185 | 31             | 14.11;<br><0.001 | 0.68<br>(50.8) | 175 | Calm |
| 2017                                                                                                                  | October 10      | October 11            | R3      | left  | 50  | 4   | 46              | 44  | 44              | 17.73;<br><0.001 | 0.64<br>(54.62) | 108 | 26             | 16.26;<br><0.001 | 0.79<br>(39.3) | 107 | SSW  |
| 2018                                                                                                                  | September 30    | September 30          | R3      | left  | 31  | 3   | 31              | 28  | 28              | 14.64;<br><0.001 | 0.72<br>(46.1)  | 173 | 11             | 7.37;<br><0.001  | 0.82<br>(36.3) | 170 | W    |
| 2018                                                                                                                  | September 29    | September 29          | R3      | right | 82  | 4   | 77 <sup>c</sup> | 68  | 68              | 27.9;<br><0.001  | 0.64<br>(54.1)  | 189 | 65             | 27.88;<br><0.001 | 0.66<br>(52.7) | 190 | Calm |
| 2017+2018, pooled sample                                                                                              |                 |                       | R3      | left  | 81  | 3-4 | 78              | 72  | 72              | 23.07;<br><0.001 | 0.57<br>(61.1)  | 134 | 37             | 18.26;<br><0.001 | 0.7<br>(48.2)  | 125 |      |
| <i>Froglets from right side population, captured before and released after start of migration (kept in captivity)</i> |                 |                       |         |       |     |     |                 |     |                 |                  |                 |     |                |                  |                |     |      |
| 2013                                                                                                                  | September 13-20 | September 21          | F2      | right | 65  | 3   | 63              | 63  | 63              | 16.86;<br><0.001 | 0.52<br>(65.78) | 316 | 49             | 13.07;<br><0.001 | 0.52<br>(65.9) | 312 | N    |

|                                                                                                                                                    |                 |              |         |       |    |   |    |    |    |                            |                |     |    |                            |                |     |      |
|----------------------------------------------------------------------------------------------------------------------------------------------------|-----------------|--------------|---------|-------|----|---|----|----|----|----------------------------|----------------|-----|----|----------------------------|----------------|-----|------|
| 2015                                                                                                                                               | September 20-25 | September 28 | F1 & F2 | left  | 69 | 3 | 63 | 63 | 63 | 14.99;<br><b>&lt;0.001</b> | 0.49<br>(68.6) | 132 | 62 | 16.18;<br><b>&lt;0.001</b> | 0.51<br>(66.4) | 132 | WNW  |
| <i>Froglets from right side population, captured and released <b>after</b> start of migration, but kept in captivity for 3 days before release</i> |                 |              |         |       |    |   |    |    |    |                            |                |     |    |                            |                |     |      |
| 2016                                                                                                                                               | September 21    | September 24 | R1      | right | 58 | 3 | 57 | 56 | 55 | 12.78;<br><b>&lt;0.001</b> | 0.56<br>(61.7) | 341 | 30 | 8.42;<br><b>&lt;0.001</b>  | 0.53<br>(64.6) | 1   | Calm |
| 2016                                                                                                                                               | September 21    | September 24 | R1      | left  | 59 | 3 | 54 | 54 | 51 | 18.81;<br><b>&lt;0.001</b> | 0.61<br>(57.2) | 350 | 16 | 9.93;<br><b>&lt;0.001</b>  | 0.79<br>(39.5) | 354 | Calm |

Notes: F, captured in forest; M, captured in the meadow; R, captured at the river bank near water.

$\mu$ , mean vector or compass directions (e.g. N for North, SW for Southwest, NNE for North-North-East, etc.); r, length of mean vector; CSD, circular standard deviation in degrees; significant differences are highlighted in bold.

\* Total number of recaptured froglets, includes individuals with body length >38 mm and froglets recaptured inside the arena outside of the groove with traps.

\*\* Total number of recaptured young-of-the-year froglets with body length  $\leq$ 38 mm includes individuals recaptured inside the arena outside of the groove with traps.

\*\*\* Number of froglets with body length  $\leq$ 38 mm and recaptured only in traps. These specimens were included in further analysis.

\*\*\*\* Since we suspected a bimodal distribution, the Rayleigh test was used after the doubling the angles procedure (Batschelet 1981).

\*\*\*\*\* Froglets that were found in the traps of arena A (left side of the river) after arena wall was broken by the wind; these froglets correspond to those caught in the meadow.

<sup>a</sup> three of two-year-old specimens from left side population were captured.

<sup>b</sup> Nine specimens were captured near the center.

<sup>c</sup> A large number of two-year-old specimens were captured.

<sup>d</sup> The majority of the froglets was found outside of traps.

**Table S2. Survey of potential hibernation sites of the froglets in winter and spring of 2019**

| Site                               | Environmental remarks                                                                                                                                                                                                                                                                                                                      | Result of revisions                                                                                                                                                                                                                                                                                                                                                                                                                                                                                                                                                                                                                                                                                                                                                                                                                            |
|------------------------------------|--------------------------------------------------------------------------------------------------------------------------------------------------------------------------------------------------------------------------------------------------------------------------------------------------------------------------------------------|------------------------------------------------------------------------------------------------------------------------------------------------------------------------------------------------------------------------------------------------------------------------------------------------------------------------------------------------------------------------------------------------------------------------------------------------------------------------------------------------------------------------------------------------------------------------------------------------------------------------------------------------------------------------------------------------------------------------------------------------------------------------------------------------------------------------------------------------|
| Bardinskii gully (capture site F1) | The slopes and bottom of the gully are formed by soft and moist soil that did not freeze during the winter under snow (January 25, the temperature dropped to -26°C) and was inhabited by insect larvae. Notably, the number of froglets in the gully, where they apparently come to eat, increases 2 weeks before the start of migration. | On April 6 (snow did not melt completely), we found two young froglets in the ground at approximately 10 cm depth; they were very inactive and most likely spent the winter there. No adult specimens were found. Like Bannikov (Bannikov, 1940), we interpret these young individuals as the specimens "late" for migration into the river before the final temperature drop. This delay can be associated with accumulation of fat essential for the hibernation. Such correlation between the start of migration and storing fat was observed in birds (Dolnik and Blyumental, 1967; King and Farner, 1963; Sandberg, 2003). Assembling in humid places before migration makes it possible for "late" frogs to survive the winter by burrowing into moist soil, where the temperature would not drop below zero due to the decay processes. |
| Stream in the Bardinskii gully     | The stream had running water under ice even after severe frosts (-26°C); during five surveys (January-March),                                                                                                                                                                                                                              | We were unable to find young-of-the-year common frogs. However, the wintering in general is possible, since on March 30 (snow did not melt), a young-of-the-year common toad and numerous live insect larvae were found in soil of the bottom of the stream (12 cm depth).                                                                                                                                                                                                                                                                                                                                                                                                                                                                                                                                                                     |
| Moskva River                       | The ice on the Moskva River broke up in late March.                                                                                                                                                                                                                                                                                        | on April 6, the first adult frogs appeared on the river bank opposite of the pond 4 and traveled in its direction; on April 9, we found the first froglets (approx. a dozen specimens) emerging from the river and moving towards the forest.                                                                                                                                                                                                                                                                                                                                                                                                                                                                                                                                                                                                  |
| Ponds                              |                                                                                                                                                                                                                                                                                                                                            | We found no froglets emerging from the ponds.                                                                                                                                                                                                                                                                                                                                                                                                                                                                                                                                                                                                                                                                                                                                                                                                  |
